# Supplementary material for: The influence of coordination modes and active sites of a 5-(triazol-1-yl) nicotinic ligand on the assembly of diverse MOFs
Source: Royal Society of Chemistry journal article supplement (doi:10.1039/c7dt01523b), 2017-01-01
Supplement: c7dt01523b1.pdf [file c7dt01523b1.pdf]

## Electronic Supplementary Information

### The Influence of Coordination Modes and Active Sites of 5-(Triazol-1-yl) Nicotinic Ligand on Assembly of Diverse Metal-Organic Frameworks: Topology Structures, Gas Sorption Behaviour and Magnetic Properties

Yang-Tian Yan,<sup>‡</sup> Si-Si Zhang,<sup>‡</sup> Guo-Ping Yang,<sup>\*</sup> Wen-Yan Zhang, Fang Zhang, Feng Cao, Rui-Feng Yang, and Yao-Yu Wang<sup>\*</sup>

*Key Laboratory of Synthetic and Natural Functional Molecule Chemistry of the Ministry of Education, Shaanxi Key Laboratory of Physico-Inorganic Chemistry, College of Chemistry & Materials Science, Northwest University, Xi'an 710127, P. R. China*

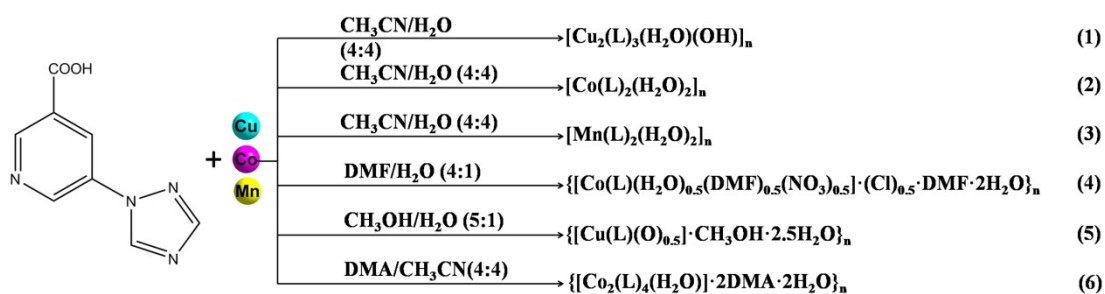

**Illustration:** Synthesis procedures for complexes 1-6.

**Table S1** Selected bond lengths (Å) and bond angles (°) for 1-6.

| Complex 1         |            |                     |            |
|-------------------|------------|---------------------|------------|
| Cu(1)-O(1)        | 1.915(5)   | Cu(2)-O(2)          | 2.299(4)   |
| Cu(1)-O(4)        | 2.025(3)   | Cu(2)-O(3)          | 1.966(3)   |
| Cu(1)-O(7)        | 1.995(3)   | Cu(2)-O(5)          | 1.956(3)   |
| Cu(1)-N(4)#2      | 1.988(4)   | Cu(2)-N(9)#3        | 2.071(4)   |
| N(4)-Cu(1)#2      | 1.988(4)   | O(1)-Cu(1)#1        | 2.449(3)   |
| Cu(1)-O(1)#1      | 2.449(3)   | Cu(2)-O(1)          | 1.939(3)   |
| O(1)-Cu(1)-O(4)   | 91.72(13)  | O(7)-Cu(1)-O(1)#1   | 102.14(10) |
| O(1)-Cu(1)-O(7)   | 93.58(13)  | O(7)-Cu(1)-O(4)     | 174.48(13) |
| O(1)-Cu(1)-N(4)#2 | 176.65(14) | N(4)#2-Cu(1)-O(1)#1 | 130.43(12) |
| O(1)-Cu(1)-O(1)#1 | 87.01(12)  | N(4)#2-Cu(1)-O(4)   | 85.18(14)  |

|                    |            |                   |            |
|--------------------|------------|-------------------|------------|
| O(4)-Cu(1)-O(1)#1  | 82.46(9)   | N(4)#2-Cu(1)-O(7) | 89.49(15)  |
| O(1)-Cu(2)-N(9)#3  | 177.09(14) | O(1)-Cu(2)-O(2)   | 91.68(13)  |
| O(3)-Cu(2)-O(2)    | 91.83(14)  | O(1)-Cu(2)-O(3)   | 90.94(13)  |
| O(3)-Cu(2)-N(9)#3  | 86.62(15)  | O(1)-Cu(2)-O(5)   | 96.88(13)  |
| Cu(2)-O(1)-Cu(1)#1 | 136.99(15) | Cu(1)-O(1)-Cu(2)  | 108.17(15) |
| N(9)#3-Cu(2)-O(2)  | 86.82(15)  | O(5)-Cu(2)-O(2)   | 96.33(14)  |
| Cu(1)-O(1)-Cu(1)#1 | 92.99(12)  | O(5)-Cu(2)-O(3)   | 168.51(14) |
| O(5)-Cu(2)-N(9)#3  | 85.77(15)  |                   |            |

Symmetrical codes: #1 -x+2, -y+2, -z+1; #2 -x+2, -y+3, z; #3 x-1, y, z; #4 x+1, y, z.

### Complex 2

|                     |            |                     |             |
|---------------------|------------|---------------------|-------------|
| Co(1)-O(3)          | 2.0809(15) | O(3)#1-Co(1)-O(2)#1 | 88.00(7)    |
| Co(1)-O(2)#1        | 2.1143(16) | O(3)-Co(1)-O(2)#1   | 92.00(7)    |
| Co(1)-O(2)          | 2.1143(16) | O(3)#1-Co(1)-O(2)   | 92.00(7)    |
| Co(1)-N(4)#2        | 2.1511(19) | O(3)-Co(1)-O(2)     | 88.00(7)    |
| Co(1)-N(4)#3        | 2.1511(19) | O(2)#1-Co(1)-O(2)   | 180.0       |
| Co(1)-O(3)#1        | 2.0809(15) | O(3)#1-Co(1)-N(4)#2 | 83.11(7)    |
| O(2)#1-Co(1)-N(4)#3 | 84.17(7)   | O(3)-Co(1)-N(4)#2   | 96.89(7)    |
| O(2)-Co(1)-N(4)#3   | 95.83(7)   | O(2)#1-Co(1)-N(4)#2 | 95.83(7)    |
| N(4)#2-Co(1)-N(4)#3 | 180.0      | O(2)-Co(1)-N(4)#2   | 84.17(7)    |
| O(3)-Co(1)-N(4)#3   | 83.11(7)   | O(3)#1-Co(1)-O(3)   | 180.0       |
| O(3)#1-Co(1)-N(4)#3 | 96.89(7)   | N(4)-Co(1)#4        | 2.1511 (19) |

Symmetrical codes: #1 -x+1, -y+2, -z; #2 -x+2, y+1/2, -z+1/2; #3 x-1, -y+3/2, z-1/2; #4 -x+2, y-1/2, -z+1/2.

### Complex 3

|                     |            |                     |            |
|---------------------|------------|---------------------|------------|
| Mn(1)-O(3)#1        | 2.1703(19) | Mn(1)-O(3)          | 2.1705(19) |
| Mn(1)-O(1)          | 2.1728(19) | O(3)-Mn(1)-O(3)#1   | 180.0      |
| Mn(1)-O(1)#1        | 2.1729(19) | O(3)-Mn(1)-O(1)     | 88.38(7)   |
| Mn(1)-N(4)#2        | 2.280(2)   | O(3)#1-Mn(1)-O(1)   | 91.62(7)   |
| Mn(1)-N(4)#3        | 2.280(2)   | O(3)-Mn(1)-O(1)#1   | 91.62(7)   |
| N(4)-Mn(1)#4        | 2.280(2)   | O(3)#1-Mn(1)-O(1)#1 | 88.38(7)   |
| O(1)-Mn(1)-N(4)#2   | 94.84(7)   | O(1)-Mn(1)-O(1)#1   | 180.0      |
| O(1)#1-Mn(1)-N(4)#2 | 85.15(7)   | O(3)-Mn(1)-N(4)#2   | 97.90(7)   |
| O(3)-Mn(1)-N(4)#3   | 97.89(7)   | O(3)#1-Mn(1)-N(4)#2 | 94.85(7)   |
| O(3)#1-Mn(1)-N(4)#3 | 82.11(7)   | O(1)#1-Mn(1)-N(4)#3 | 85.15(7)   |
| O(1)-Mn(1)-N(4)#3   | 85.16(7)   | N(4)#2-Mn(1)-N(4)#3 | 180.0      |

Symmetrical codes: #1 -x+1, -y+2, -z; #2 -x+2, y+1/2, -z+1/2; #3 x-1, -y+3/2, z-1/2; #4 -x+2, y-1/2, -z+1/2.

### Complex 4

|            |          |              |          |
|------------|----------|--------------|----------|
| Co(1)-O(3) | 2.178(6) | Co(1)-O(4)#1 | 2.110(5) |
|------------|----------|--------------|----------|

|                   |           |                     |            |
|-------------------|-----------|---------------------|------------|
| Co(1)-O(5)#2      | 2.072(5)  | N(5)#3-Co(1)-O(3)   | 85.4(3)    |
| Co(1)-O(1)        | 2.132(5)  | O(4)#1-Co(1)-N(5)#3 | 88.7(2)    |
| Co(1)-N(3)        | 2.170(6)  | O(5)#2-Co(1)-O(4)#1 | 97.2(3)    |
| Co(1)-N(5)#3      | 2.159(6)  | O(5)#2-Co(1)-O(3)   | 89.8(3)    |
| O(4)-Co(1)#4      | 2.110(5)  | O(5)#2-Co(1)-O(1)   | 89.6(2)    |
| O(5)-Co(1)#5      | 2.072(5)  | O(5)#2-Co(1)-N(3)   | 175.4(3)   |
| O(1)-Co(1)#6      | 2.132(5)  | O(5)#2-Co(1)-N(5)#3 | 86.1(2)    |
| N(5)-Co(1)#7      | 2.159(6)  | O(1)-Co(1)-O(3)     | 91.5(3)    |
| O(4)#1-Co(1)-O(3) | 170.63(2) | O(1)-Co(1)-N(3)     | 91.6(2)    |
| O(4)#1-Co(1)-O(1) | 94.8(2)   | O(1)-Co(1)-N(5)#3   | 174.78(19) |
| O(4)#1-Co(1)-N(3) | 87.0(3)   | N(3)-Co(1)-O(3)     | 85.4(3)    |
| N(1)-O(1)-Co(1)#6 | 123.0(2)  | N(5)#3-Co(1)-N(3)   | 92.3(3)    |
| N(1)-O(1)-Co(1)   | 123.0(2)  | Co(1)#6-O(1)-Co(1)  | 113.7(4)   |

Symmetrical codes: #1 -x+y-1, -x-1, z-1/3; #2 y, x+1, -z; #3 -x+y-1, -x-1, z+2/3; #4 -y-1, x-y, z+1/3; #5 y-1, x, -z; #6 x-y, -y, -z-1/3; #7 -y-1, x-y, z-2/3.

#### Complex 5

|                   |          |                     |           |
|-------------------|----------|---------------------|-----------|
| Cu(1)-O(1)        | 2.276(5) | N(4)#2-Cu(1)-N(1)#1 | 92.3(2)   |
| Cu(1)-N(1)#1      | 2.076(6) | O(2)#3-Cu(1)-O(1)   | 98.6(2)   |
| Cu(1)-N(4)#2      | 2.013(6) | O(2)#3-Cu(1)-N(1)#1 | 168.8(2)  |
| Cu(1)-O(2)#3      | 1.992(4) | O(2)#3-Cu(1)-N(4)#2 | 85.1(2)   |
| Cu(1)-O(3)        | 1.903(4) | O(3)-Cu(1)-O(1)     | 94.84(18) |
| N(1)-Cu(1)#4      | 2.076(6) | O(3)-Cu(1)-N(1)#1   | 88.8(2)   |
| O(3)-Cu(1)#3      | 1.903(4) | O(3)-Cu(1)-N(4)#2   | 175.8(2)  |
| N(1)#1-Cu(1)-O(1) | 92.1(2)  | O(3)-Cu(1)-O(2)#3   | 93.02(17) |
| N(4)#2-Cu(1)-O(1) | 89.1(2)  | Cu(1)-O(3)-Cu(1)#3  | 118.4(4)  |

Symmetrical codes: #1 -x+y+1, -x+1, z+1/3; #2 x, y, z+1; #3 y, x, -z+1; #4 -y+1, x-y, z-1/3; #5 x, y, z-1.

#### Complex 6

|                 |           |                     |            |
|-----------------|-----------|---------------------|------------|
| Co(1)-O(1)      | 2.083(3)  | N(5)-Co(1)-O(5)     | 92.84(13)  |
| O(5)-Co(1)#5    | 2.144(2)  | N(5)-Co(1)-N(1)#2   | 91.23(16)  |
| Co(1)-O(4)#1    | 2.071(3)  | Co(1)-O(5)-Co(1)#5  | 114.91(18) |
| Co(1)-O(5)      | 2.144(2)  | O(4)#1-Co(1)-O(1)   | 172.69(15) |
| Co(1)-N(1)#2    | 2.134(4)  | O(4)#1-Co(1)-O(5)   | 91.17(11)  |
| Co(1)-N(5)      | 2.118(4)  | O(4)#1-Co(1)-N(1)#2 | 89.65(14)  |
| O(3)-Co(1)#3    | 2.052(4)  | O(4)#1-Co(1)-N(5)   | 86.44(17)  |
| O(4)-Co(1)#4    | 2.071(3)  | N(1)#2-Co(1)-O(5)   | 175.89(13) |
| O(1)-Co(1)-O(5) | 91.22(11) | O(1)-Co(1)-N(1)#2   | 88.45(13)  |
| O(1)-Co(1)-N(5) | 86.54(16) |                     |            |

Symmetrical codes: #1  $-y+1, x-y, z-1/3$ ; #2  $y+1, -x+y+1, z-1/3$ ; #3  $x-y, x, z+1/3$ ; #4  $-x+y+1, -x+1, z+1/3$ ; #5  $-x+1, -y, z$ .

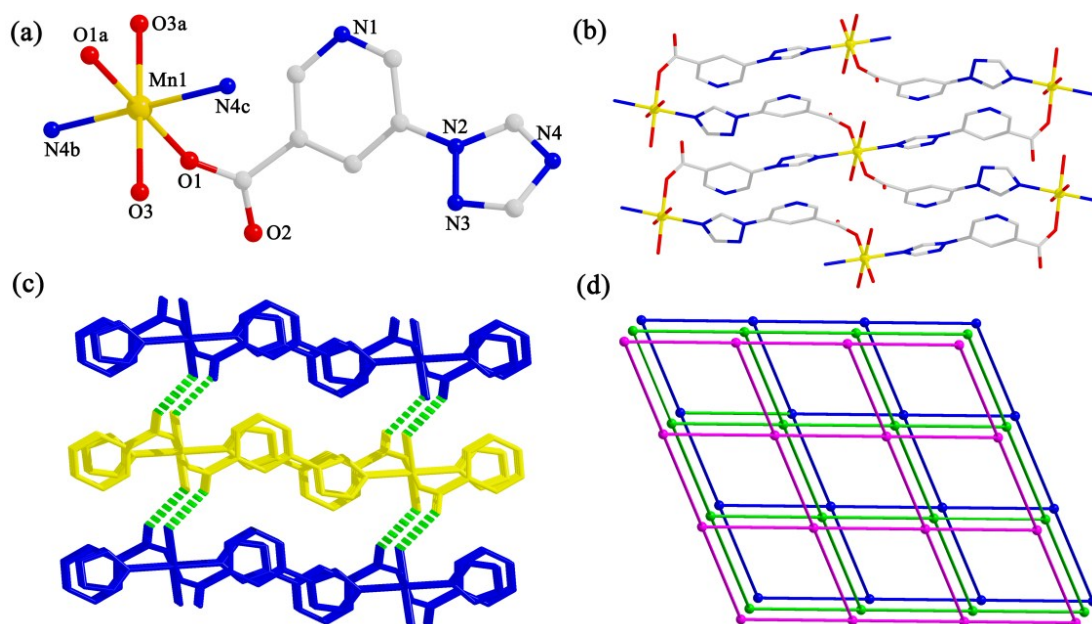

**Fig. S1** (a) Coordination environment around the Mn(II) ions in **3**. Symmetry codes: a:  $1-x, 2-y, -z$ ; b:  $-1+x, 1.5-y, -0.5+z$ ; c:  $2-x, 0.5+y, 0.5-z$ . (gray C, red O, blue N, yellow Mn); (b) 2D layers structure in **3**. (c) The hydrogen bonds between the adjacent layers. (d) The uninodal 4-connected *sqf* net for **3**.

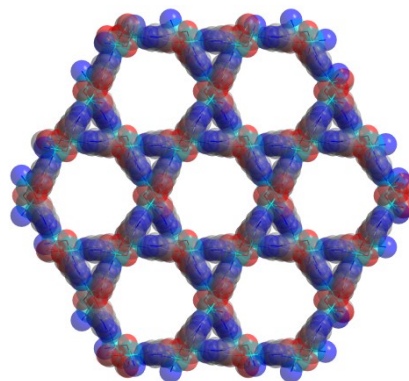

**Fig. S2** 3D microporous framework of **5** and the hexagon shape of 1D channel along *c* axis. All the H atoms and guest molecules are omitted for clarity.

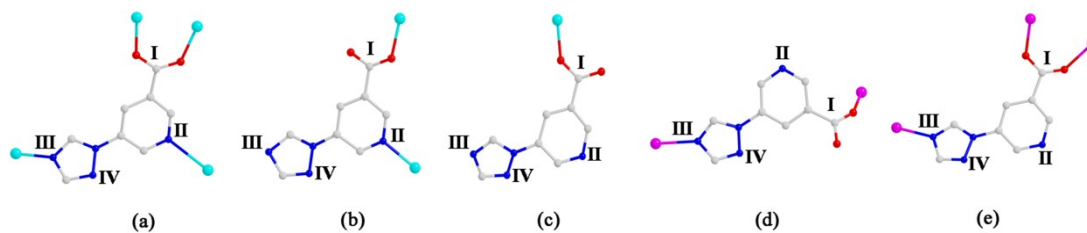

**Fig. S3** Coordination modes of  $H_3L$  in **1-6**.

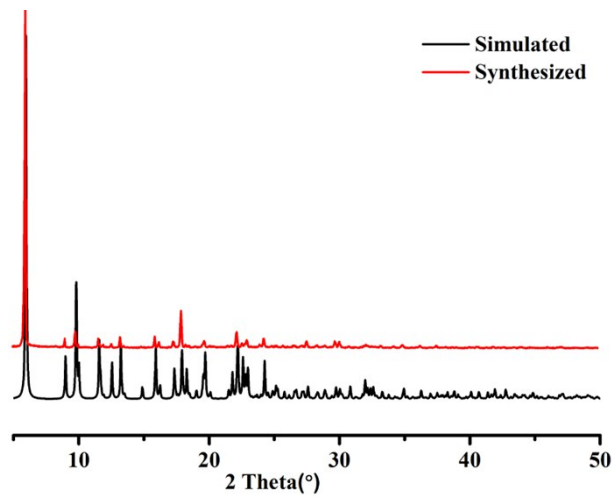

(a)

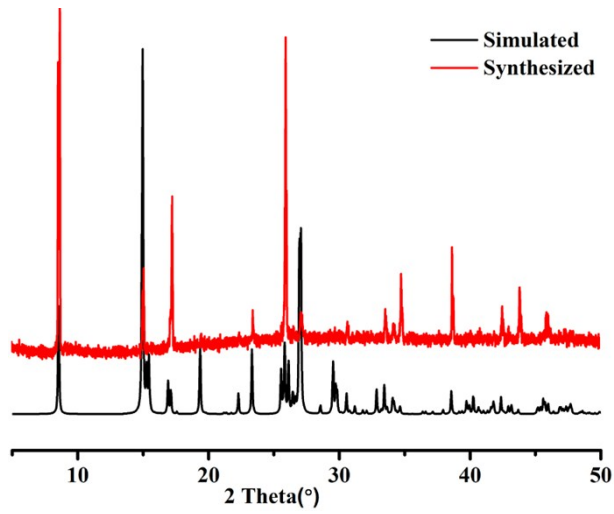

(b)

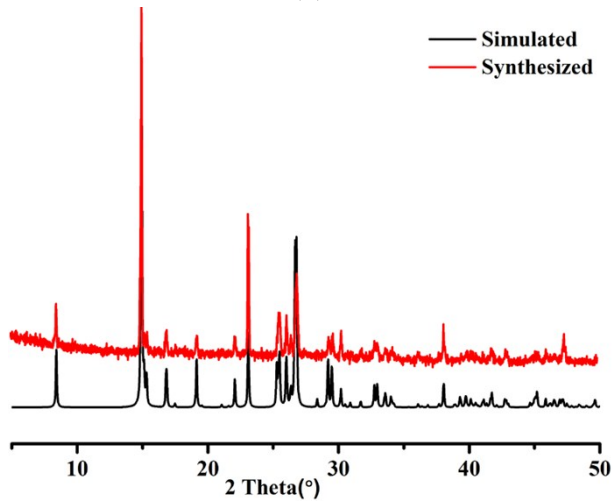

(c)

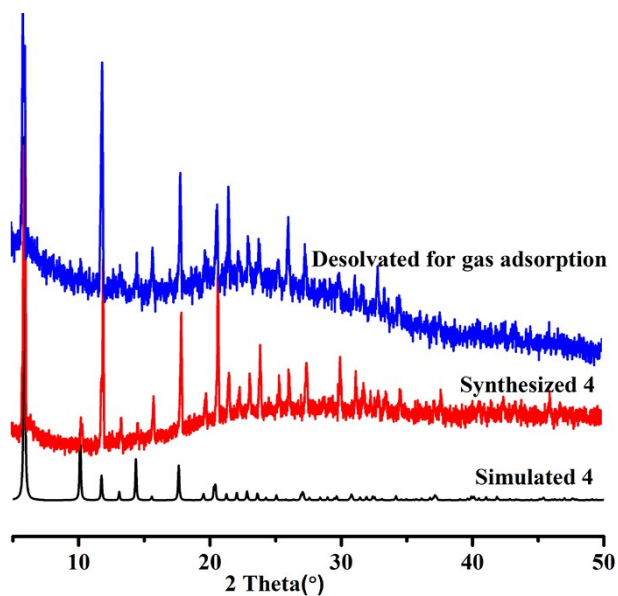

(d)

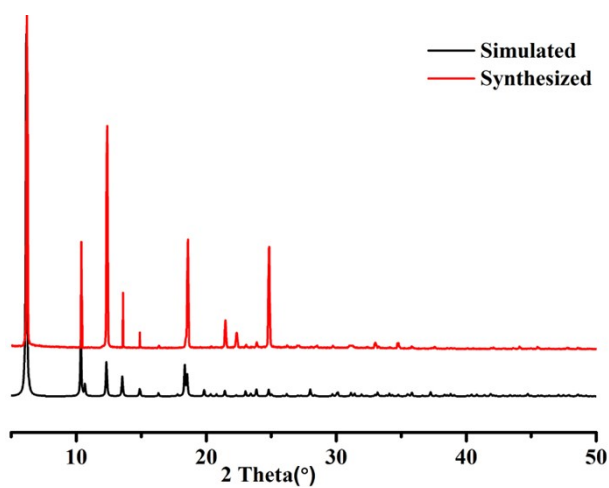

(e)

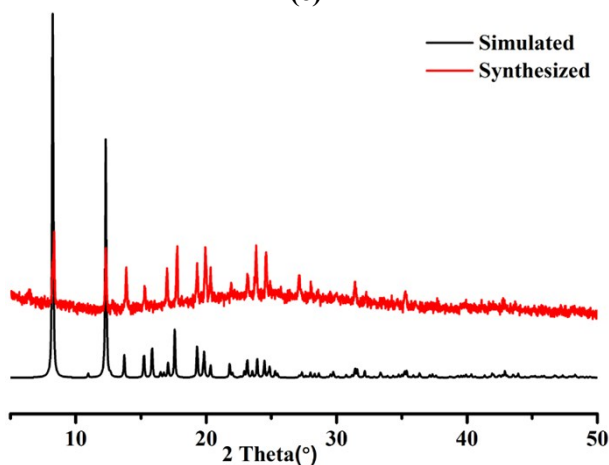

(f)

**Fig. S4** PXRD patterns of **1-6** in (a-f) simulated from the X-ray single-crystal structure, experimental samples and desolvated samples.

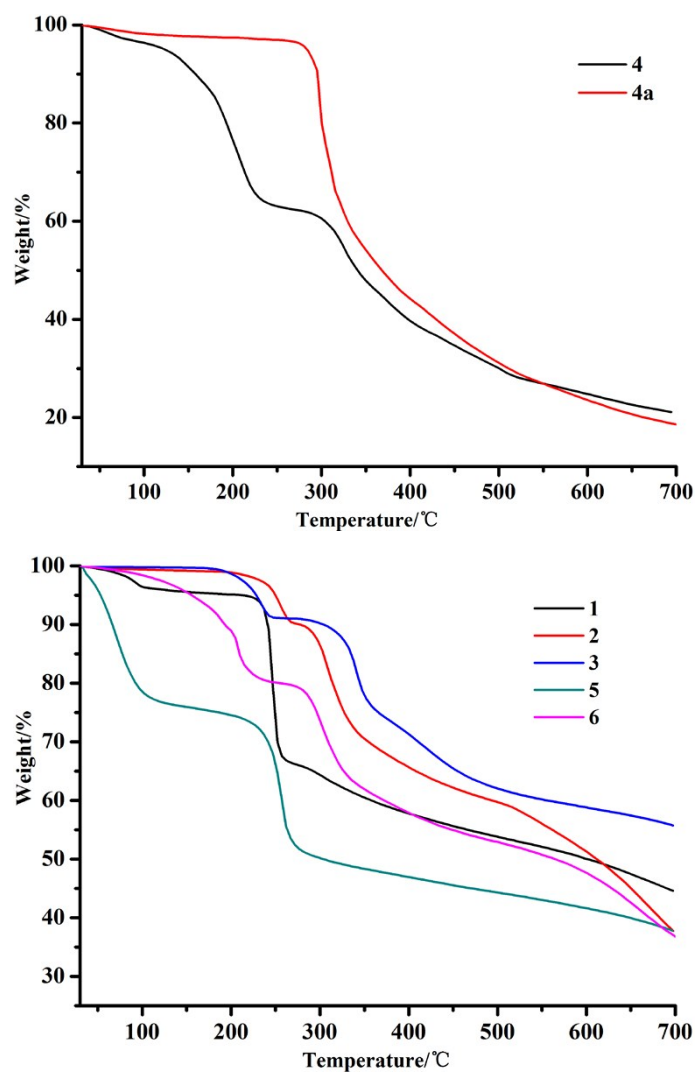

Fig. S5 TGA plots of complexes 1-6.

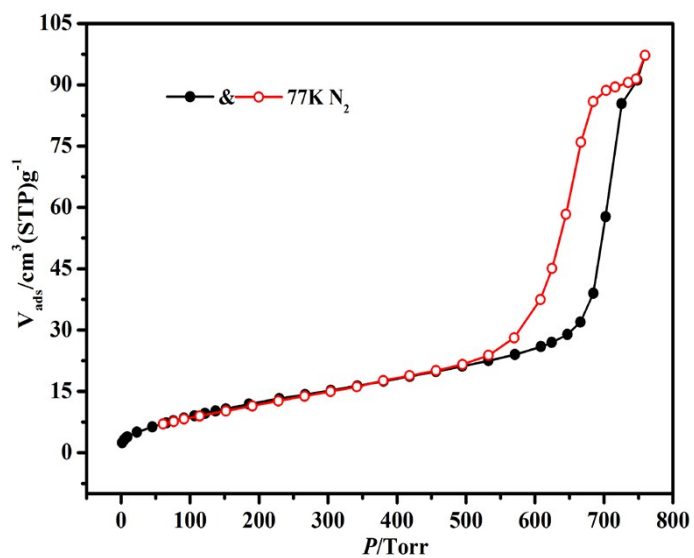

Fig. S6  $\text{N}_2$  adsorption and desorption isotherm at 77K of 4a.

**IAST adsorption selectivity calculation**

The experimental isotherm data for pure CO<sub>2</sub>, CH<sub>4</sub> and N<sub>2</sub> (measured at 273 and 298 K) were fitted using a Langmuir-Freundlich (L-F) model

$$q = \frac{a * b * p^c}{1 + b * p^c}$$

Where  $q$  and  $p$  are adsorbed amounts and pressures of component  $i$ , respectively. The adsorption selectivities for binary mixtures of CO<sub>2</sub>/CH<sub>4</sub> at 273 and 298 K and CO<sub>2</sub>/N<sub>2</sub> at 298 K, defined by

$$S_{ads} = (q_1 / q_2) / (p_1 / p_2)$$

Where  $q_i$  is the amount of  $i$  adsorbed and  $p_i$  is the partial pressure of  $i$  in the mixture.

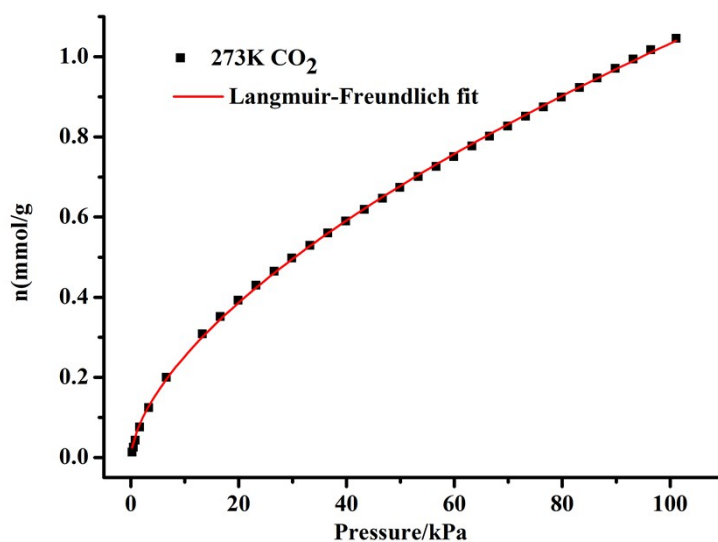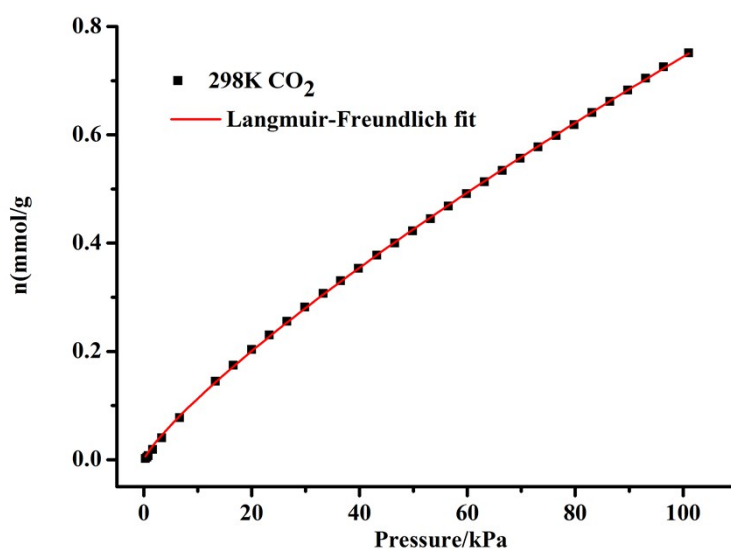



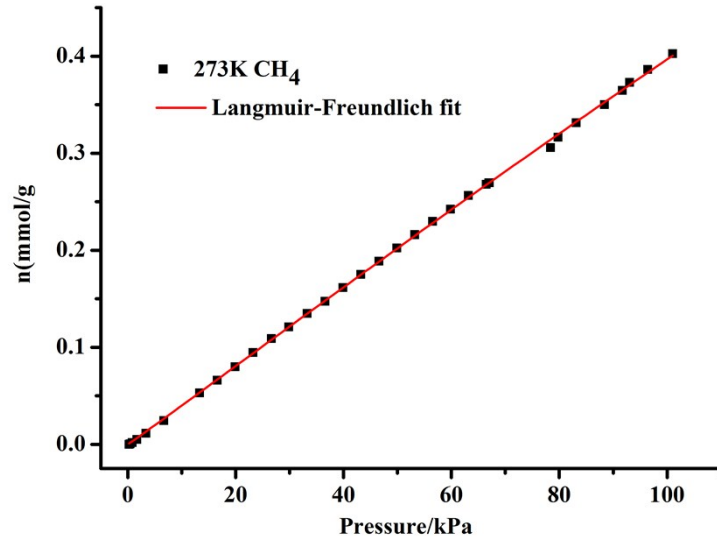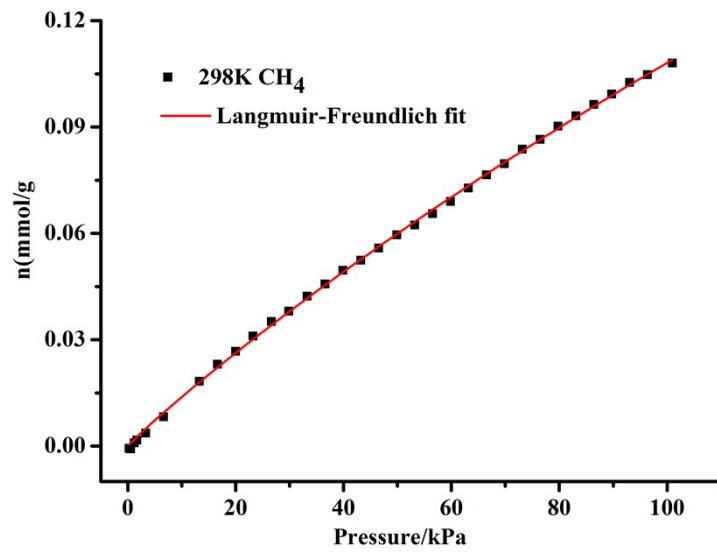

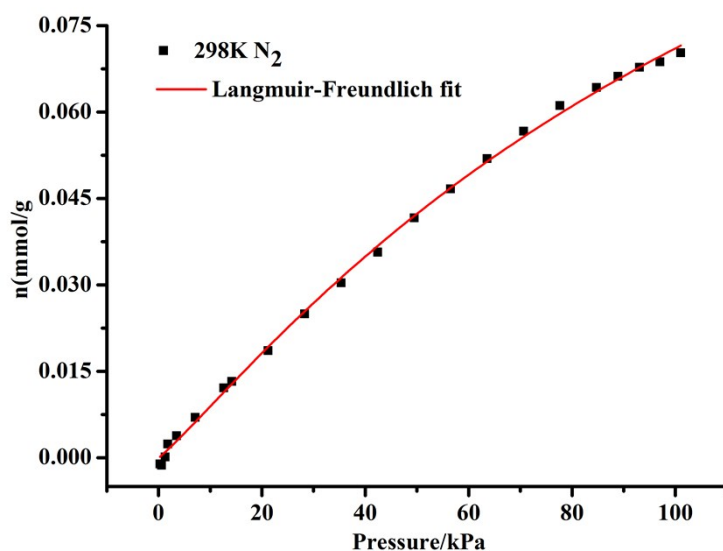

**Fig. S7** CO<sub>2</sub> adsorption isotherms of **4a** at 273 K with fitting by L-F model:  $a = 41.89057$ ,  $b = 0.00145$ ,  $c = 0.62074$ ,  $\text{Chi}^2 = 3.65 \times 10^{-5}$ ,  $R^2 = 0.99963$ ; CO<sub>2</sub> adsorption isotherms of **4a** at 298 K with fitting by L-F model:  $a = 15.38937$ ,  $b = 0.00107$ ,  $c = 0.83754$ ,  $\text{Chi}^2 = 8.91 \times 10^{-6}$ ,  $R^2 = 0.99984$ ; CH<sub>4</sub> adsorption isotherms of **4a** at 273K with fitting by L-F model:  $a = 5.65559$ ,  $b = 6.68 \times 10^{-4}$ ,  $c = 1.02627$ ,  $\text{Chi}^2 = 4.44 \times 10^{-6}$ ,  $R^2 = 0.99973$ ; CH<sub>4</sub> adsorption isotherms of **4a** at 298 K with fitting by L-F model:  $a = 0.81106$ ,  $b = 0.00196$ ,  $c = 0.94703$ ,  $\text{Chi}^2 = 6.51 \times 10^{-7}$ ,  $R^2 = 0.99947$ ; N<sub>2</sub> adsorption isotherms of **4a** at 298 K with fitting by L-F model:  $a = 0.0225$ ,  $b = 3.15 \times 10^{-4}$ ,  $c = 1.11251$ ,  $\text{Chi}^2 = 9.16 \times 10^{-7}$ ,  $R^2 = 0.99871$ .

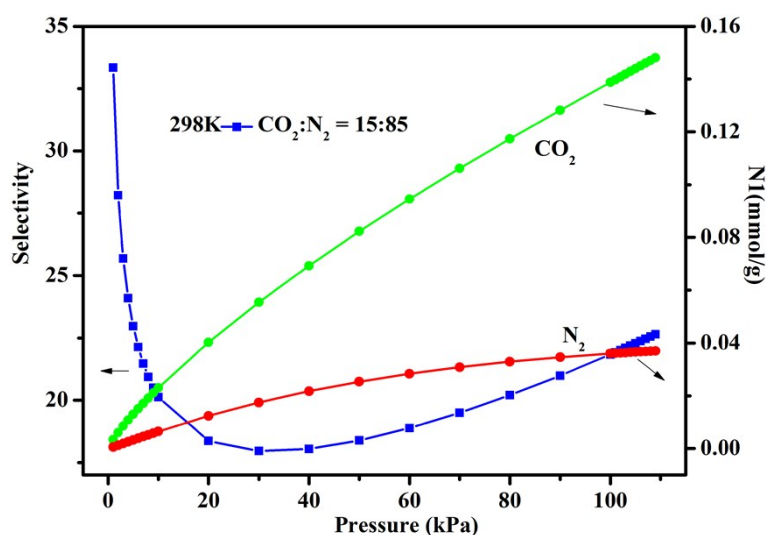

**Fig. S8** IAST adsorption selectivity of **4a** for the CO<sub>2</sub>/N<sub>2</sub> mixtures with 15:85 components at 298 K.

**Calculation of sorption heat for CO<sub>2</sub> uptake using Virial 2 model**

$$\ln P = \ln N + 1/T \sum_{i=0}^m aiN^i + \sum_{i=0}^n biN^i Q_{st} = -R \sum_{i=0}^m aiN^i$$

The above equation was applied to fit the combined CO<sub>2</sub> isotherm data for desolvated **4a** at 273 and 298 K, where  $P$  is the pressure,  $N$  is the adsorbed amount,  $T$  is the temperature,  $ai$  and  $bi$  are virial coefficients, and  $m$  and  $n$  are the number of coefficients used to describe the isotherms.  $Q_{st}$  is the coverage-dependent enthalpy of adsorption and  $R$  is the universal gas constant.

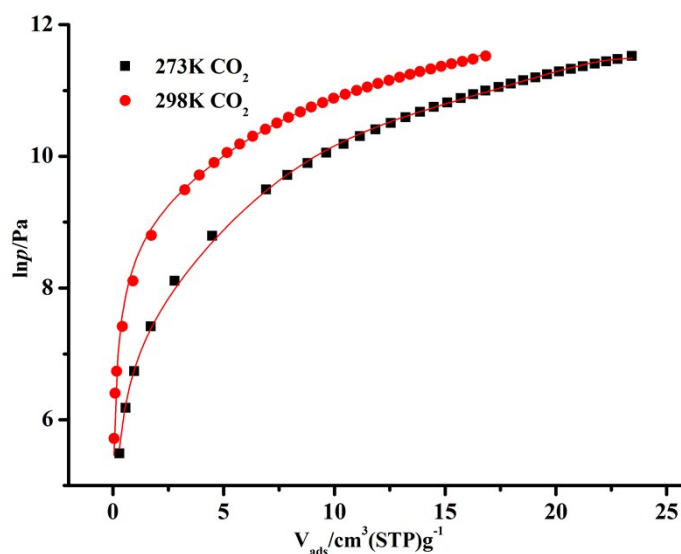

**Fig. S9** Virial analysis of the CO<sub>2</sub> adsorption data at 273 and 298 K for **4a**. Fitting results:  $a_0 = -5636.56569$ ,  $a_1 = 432.87858$ ,  $a_2 = -1.14691$ ,  $a_3 = -1.48544$ ,  $a_4 = 0.06519$ ,  $\chi^2 = 0.00403$ ,  $R^2 = 0.99838$ .

### Magnetic properties of **1**, **2**, **4**, **5** and **6**

The antiferromagnetic properties of **1**, **2**, **4**, **5** and **6** are briefly discussed as below. As shown in Fig. S10a, the  $\chi_M T$  of **1** at room temperature is  $0.96 \text{ cm}^3 \text{ K mol}^{-1}$ , which is in fair agreement with the theoretical value ( $0.75 \text{ cm}^3 \text{ K mol}^{-1}$ ) calculated from two Cu(II) ions ( $S = 1/2$ ,  $g = 2$ ). Upon cooling, the  $\chi_M T$  starts to slowly decrease to 18 K, and then sharply decreases to  $0.24 \text{ cm}^3 \text{ K mol}^{-1}$  at 2 K, indicating the antiferromagnetic interactions between Cu ions. The temperature dependence of the reciprocal susceptibilities ( $1/\chi_M$ ) of **1** is fitted from 25 K to 300 K, which obeys the Curie–Weiss law,  $\chi_M = C/(T - \theta)$ , with  $\theta = -6.38 \text{ K}$  and  $C = 1.20 \text{ cm}^3 \text{ K mol}^{-1}$ . The negative  $\theta$  value manifests the presence of antiferromagnetic interactions among tetranuclear Cu(II) ions.<sup>1</sup>

For **2**, the  $\chi_M T$  at room temperature is  $2.97 \text{ cm}^3 \text{ K mol}^{-1}$  (Fig. S10b), which is greatly larger than the spin-only value ( $1.875 \text{ cm}^3 \text{ K mol}^{-1}$ ) for one isolated Co(II) ion ( $S = 3/2$ ), resulting from the significant orbital contribution of high-spin Co(II) ion. Upon cooling, the  $\chi_M T$  continuously decreases to  $0.95 \text{ cm}^3 \text{ K mol}^{-1}$  at 2 K, which is ascribed to the antiferromagnetic interactions between Co(II) ions. The temperature dependence of the reciprocal susceptibilities ( $1/\chi_M$ ) of **2** obeys the Curie–Weiss law, the best-fit parameters for the Curie–

Weiss model in the temperature region of 25 ~ 300 K gives  $\theta = -15.96$  K and  $C = 3.11$  cm<sup>3</sup> K mol<sup>-1</sup>. The negative  $\theta$  value indicates the antiferromagnetic interactions among adjacent Co(II) ions.<sup>2</sup>

For **4**, the  $\chi_M T$  at room temperature is 3.05 cm<sup>3</sup> K mol<sup>-1</sup> (Fig. S10c), which is greatly larger than the spin-only value (1.875 cm<sup>3</sup> K mol<sup>-1</sup>) for one isolated Co(II) ion ( $S=3/2$ ), resulting from the significant orbital contribution of high-spin Co(II) ion. Upon cooling, the  $\chi_M T$  continuously decreases to 1.10 cm<sup>3</sup> K mol<sup>-1</sup> at 2 K, which is ascribed to the antiferromagnetic interactions between Co(II) ions. The temperature dependence of the reciprocal susceptibilities ( $1/\chi_M$ ) of **4** obeys the Curie–Weiss law, the best-fit parameters for the Curie–Weiss model in the temperature region of 100~ 300 K gives  $\theta = -5.96$  K and  $C = 3.15$  cm<sup>3</sup> K mol<sup>-1</sup>. The negative  $\theta$  value indicates the antiferromagnetic interactions among adjacent Co(II) ions.

For **5**, the  $\chi_M T$  at room temperature is 0.35 cm<sup>3</sup> K mol<sup>-1</sup> (Fig. S10d), which is close to the theoretical value (0.375 cm<sup>3</sup> K mol<sup>-1</sup>) calculated from one Cu(II) ion ( $S= 1/2$ ,  $g=2$ ). Upon cooling, the  $\chi_M T$  starts to slowly decrease to 0.02 cm<sup>3</sup> K mol<sup>-1</sup> at 2 K, indicating the antiferromagnetic interactions between Cu ions. The temperature dependence of the reciprocal susceptibilities ( $1/\chi_M$ ) of **5** is fitted from 120 K to 300 K, which obeys the Curie–Weiss law with  $\theta = -458.04$  K and  $C = 0.90$  cm<sup>3</sup> K mol<sup>-1</sup>. The negative  $\theta$  value manifests the presence of antiferromagnetic interactions among Cu(II) ions.

For **6**, the  $\chi_M T$  at room temperature is 5.98 cm<sup>3</sup> K mol<sup>-1</sup> (Fig. S10e), which is greatly larger than the spin-only value (3.75 cm<sup>3</sup> K mol<sup>-1</sup>) for two Co(II) ions ( $S=3/2$ ), resulting from the significant orbital contribution of high-spin Co(II) ion. Upon cooling, the  $\chi_M T$  continuously decreases to 0.22 cm<sup>3</sup> K mol<sup>-1</sup> at 2 K, which is ascribed to the antiferromagnetic interactions between Co(II) ions. The temperature dependence of the reciprocal susceptibilities ( $1/\chi_M$ ) of **6** obeys the Curie–Weiss law, the best-fit parameters for the Curie–Weiss model in the temperature region of 100~ 300 K gives  $\theta = -25.34$  K and  $C = 6.54$  cm<sup>3</sup> K mol<sup>-1</sup>. The negative  $\theta$  value indicates the antiferromagnetic interactions among adjacent Co(II) ions.

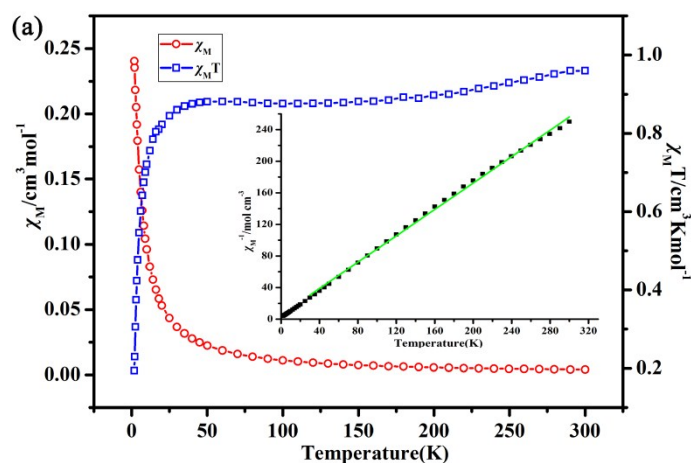

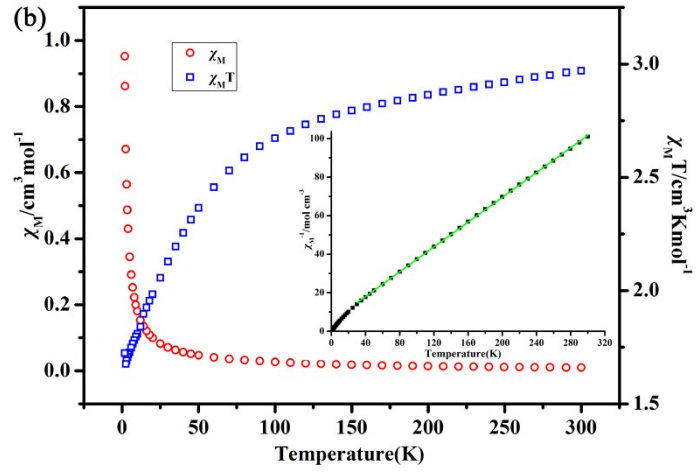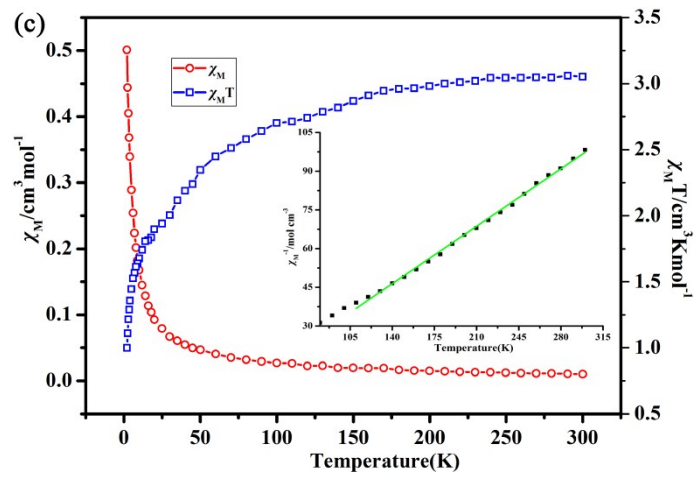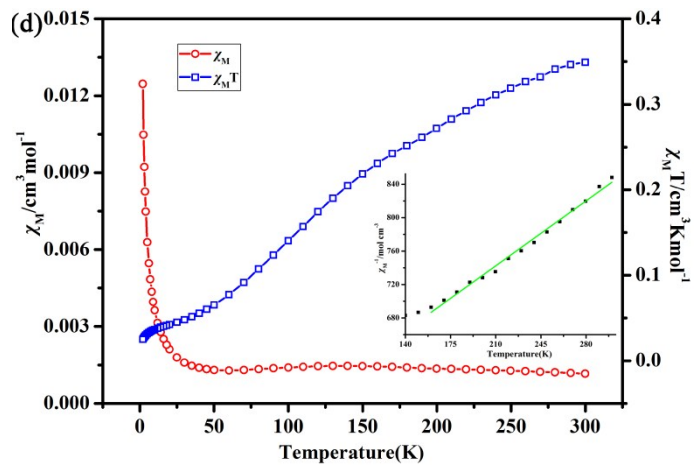

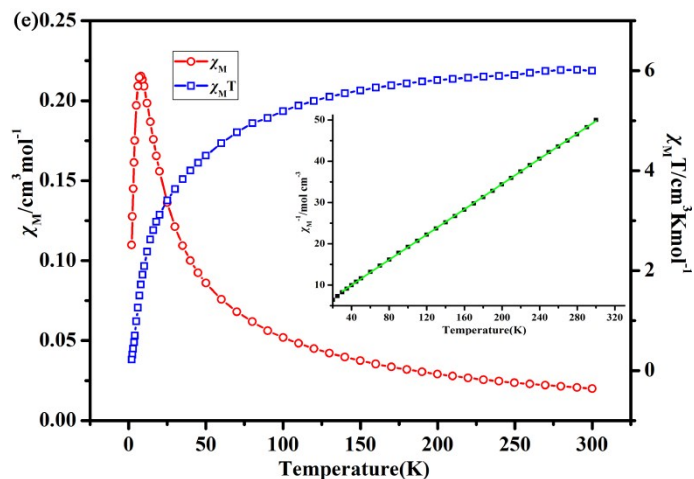

**Fig. S10** The  $\chi_M T$ ,  $\chi_M$ , and  $1/\chi_M$  vs.  $T$  plots of **1**, **2**, **4**, **5** and **6** in (a-e), respectively. The green line represents the fits.

### Reference

- 1 (a) D. W. Ryu, W. R. Lee, K. S. Lim, W. J. Phang, C. S. Hong, *Cryst. Growth Des.*, 2014, **14**, 6472–6477. (b) S. Bala, S. Bhattacharya, A. Goswami, A. Adhikary, S. Konar, R. Mondal, *Cryst. Growth Des.*, 2014, **14**, 6391–6398.
- 2 (a) Z. Chen, B. Zhao, P. Cheng, X. Q. Zhao, W. Shi, Y. Song, *Inorg. Chem.*, 2009, **48**, 3493–3495. (b) Q.-J. Zhang, B.-H. Li, L. Chen, *Inorg. Chem.*, 2013, **52**, 9356–9362. (c) D.-M. Chen, X.-Z. Ma, X.-J. Zhang, N. Xu, P. Cheng, *Inorg. Chem.*, 2015, **54**, 2976–2982. (d) X.-Y. Liu, L. Sun, H.-L. Zhou, P.-P. Cen, X.-Y. Jin, G. Xie, S.-P. Chen, Q.-L. Hu, *Inorg. Chem.*, 2015, **54**, 8884–8886.

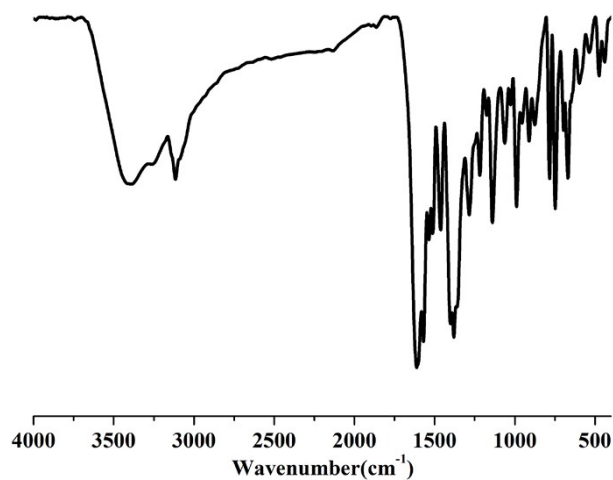

**(a)**

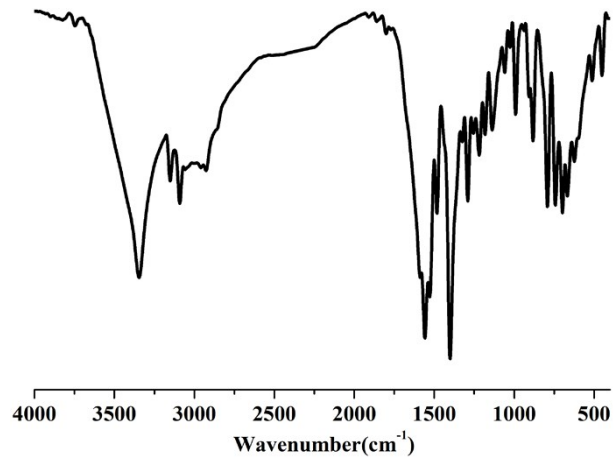

(b)

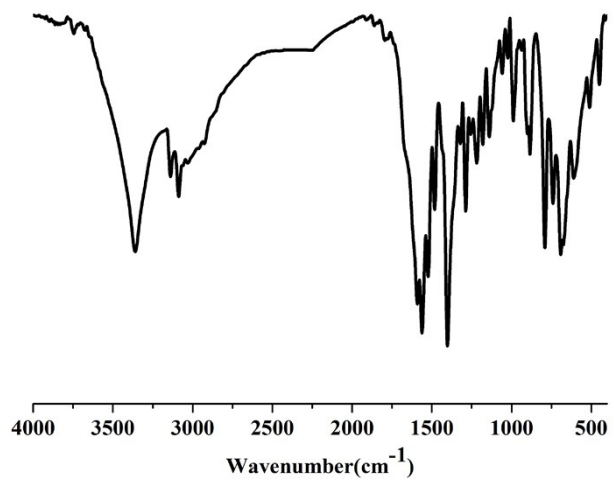

(c)

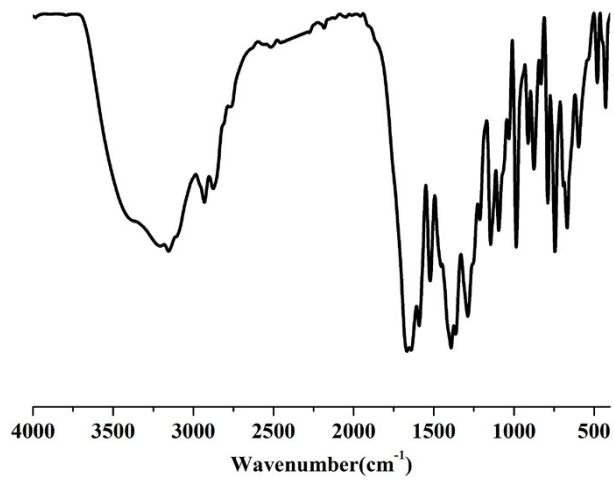

(d)

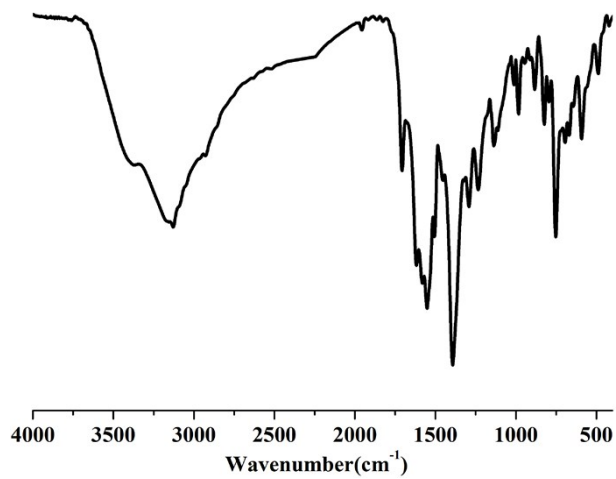

(e)

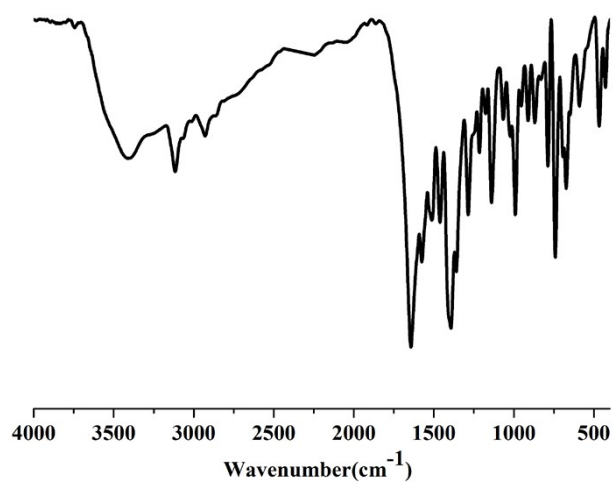

(f)

**Fig. S11** IR spectra of the as-synthesized **1-6** in (a-f).
